# Supplementary material
Source: PubMed Central journal article supplement (PMC4151745)
Supplement: 1323955111_pnas.201323955SI.pdf [file 1323955111_pnas.201323955SI.pdf]

# Supporting Information

Uri-Belapolsky et al. 10.1073/pnas.1323955111

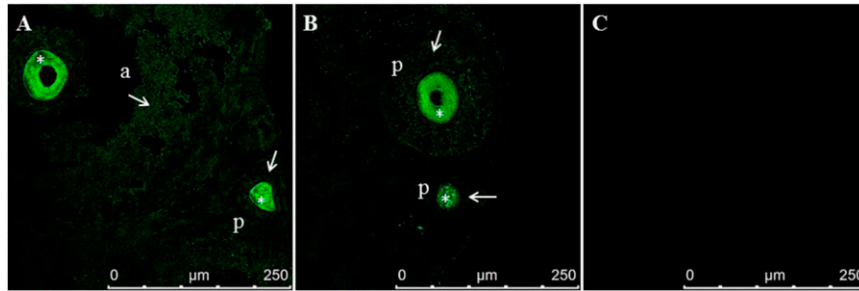

**Fig. S1.** B-cell lymphoma 2-associated X protein (Bax) is expressed in granulosa cells (GCs) and oocytes. (A and B) Paraffin-embedded sections of ovaries from 2.5-mo-old WT mice were stained with anti-Bax antibody (green). Bax is detected in the cytoplasm of GCs (arrows) and oocytes (asterisks) of antral (a) and preantral (p) follicles. (C) Negative control using secondary antibody alone is shown in micrographs. (Scale bars: 250  $\mu\text{m}$ .)

**Table S1. Specific primers used (all mouse)**

| Primers                                           | Sequence (5'-3')        |
|---------------------------------------------------|-------------------------|
| <b>Primers for PCR</b>                            |                         |
| IL-1 $\alpha$                                     |                         |
| Forward                                           | TTGGTTGAGGGAATCATT CAT  |
| Reverse                                           | TCCATAACCCATGATCTGGAA   |
| IL-1 $\beta$                                      |                         |
| Forward                                           | GTGGCAGCTACCTGTGTCT     |
| Reverse                                           | GAGCCTGTAGTGCAGTTGTCT   |
| IL-1 receptor type I                              |                         |
| Forward                                           | CTCTGCTGTCTCGTGGAGATT   |
| Reverse                                           | GAAGGTGGCCTGTGTGC       |
| GAPDH                                             |                         |
| Forward                                           | GTGAAGGTCGGTGTGAACGG    |
| Reverse                                           | GTGATGGCATGGACTGTGGTC   |
| <b>Primers for quantitative PCR</b>               |                         |
| FSH receptor                                      |                         |
| Forward                                           | AGTGTTTAAATGCCTGTGTTGGA |
| Reverse                                           | ACCCTGAGGCCTTCCAGA      |
| B-cell lymphoma 2<br>(Bcl-2)-associated X protein |                         |
| Forward                                           | GGTCCCGAAGTAGGAGAGGA    |
| Reverse                                           | GAACCATCATGGGCTGGA      |
| Bcl-2                                             |                         |
| Forward                                           | GCTGAGCAGGGTCTTCAGAG    |
| Reverse                                           | GTACCTGAACCGGCATCTG     |
| IL-6                                              |                         |
| Forward                                           | AGCCAGAGTCCTTCAGAG      |
| Reverse                                           | CCACTCCTTCTGTGACTC      |
| IL-10                                             |                         |
| Forward                                           | GTTGTCCAGCTGGTCCTTTG    |
| Reverse                                           | CAGCCGGGAAGACAATAACT    |
| TNF- $\alpha$                                     |                         |
| Forward                                           | GAGGCCATTTGGGAATTCT     |
| Reverse                                           | TGCCTATGTCTCAGCCTCTTC   |
| IL-1 $\beta$                                      |                         |
| Forward                                           | TCTTCTTTGGGTATTGCTTGG   |
| Reverse                                           | TGTAATGAAAGACGGCACACC   |
| Hypoxanthine phosphoribosyltransferase 1          |                         |
| Forward                                           | CTGGTTCATCATCGCTAATCAC  |
| Reverse                                           | GGAGCGGTAGCACCTCCT      |
| GAPDH                                             |                         |
| Forward                                           | GTGAAGGTCGGTGTGAACGG    |
| Reverse                                           | GTGATGGCATGGACTGTGGTC   |
